# Supplementary material
Source: PubMed Central journal article supplement (PMC2901535)
Supplement: NIHMS214549-supplement-1_si_001.pdf [file NIHMS214549-supplement-1_si_001.pdf]

## Supplementary Information

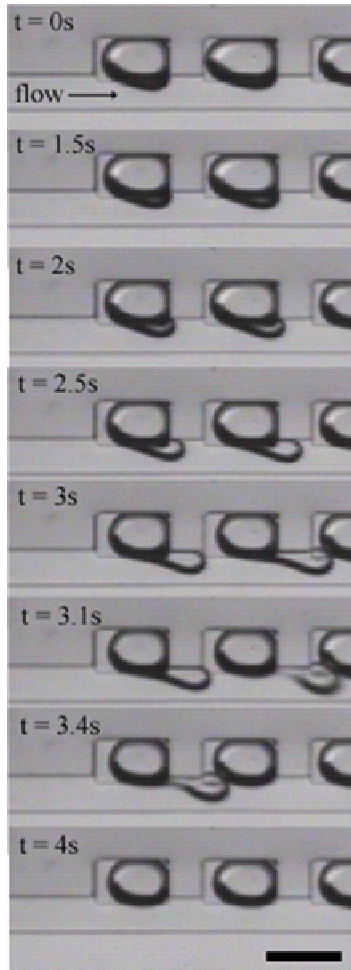

**Supplementary Figure 1.** Digitized samples could be released from the sample compartments by flowing immiscible phase through the device at an elevated flow rate. In these images, the sample phase was 1nM phosphate buffer and the immiscible phase was light mineral oil with 0.01% Span 80. The flow rate of the immiscible phase was 3 $\mu$ L per minute. The scale bar corresponds to 200  $\mu$ m.

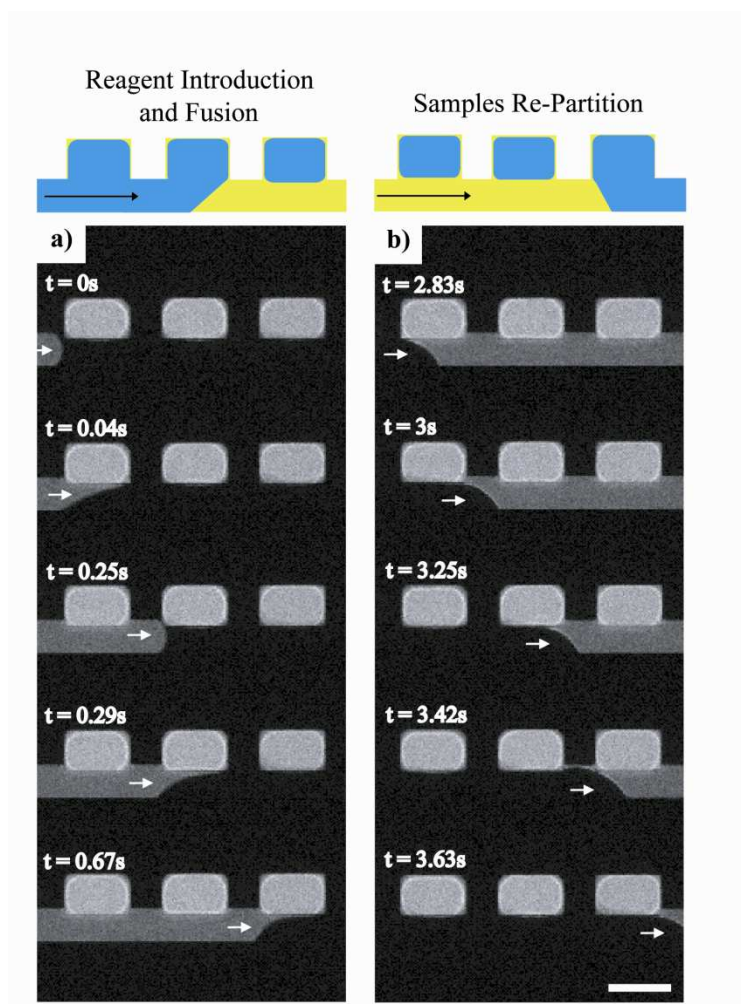

**Supplementary Figure 2.** Aqueous reagents could be added to digitized samples by flowing an aqueous reagent through the main channel and displacing the immiscible phase. Blue in schematic denotes aqueous phase (sample and additional reagent) and yellow denotes immiscible phase. An experimental time sequence illustrates this phenomenon (**a**) and **b**). The images show the fluorescence of the sample phase and the aqueous reagent (both were  $100\mu\text{M}$  Alexa488). The immiscible phase was light mineral oil with 0.01% Span 80. **a**) As immiscible phase was displaced from the main channel by the reagent phase, the aqueous reagent fused with aqueous samples in the side cavities. Fusion is seen in the images by an abrupt change in the shape of the

aqueous/immiscible phase interface. For example, see the first two sequential images in the left-hand panel,  $t = 0\text{s}$  and  $t = 0.04\text{s}$ . **b)** Following fusion, the digitized samples were re-partitioned by flowing immiscible phase through the main channel. If the aqueous plug in the main channel is long and remains fused with multiple digitized volumes along the main channel, there is risk of diffusional cross mixing between the digitized sample volumes. To minimize this issue, a short reagent plug should be used. The scale bar corresponds to  $200\ \mu\text{m}$ .

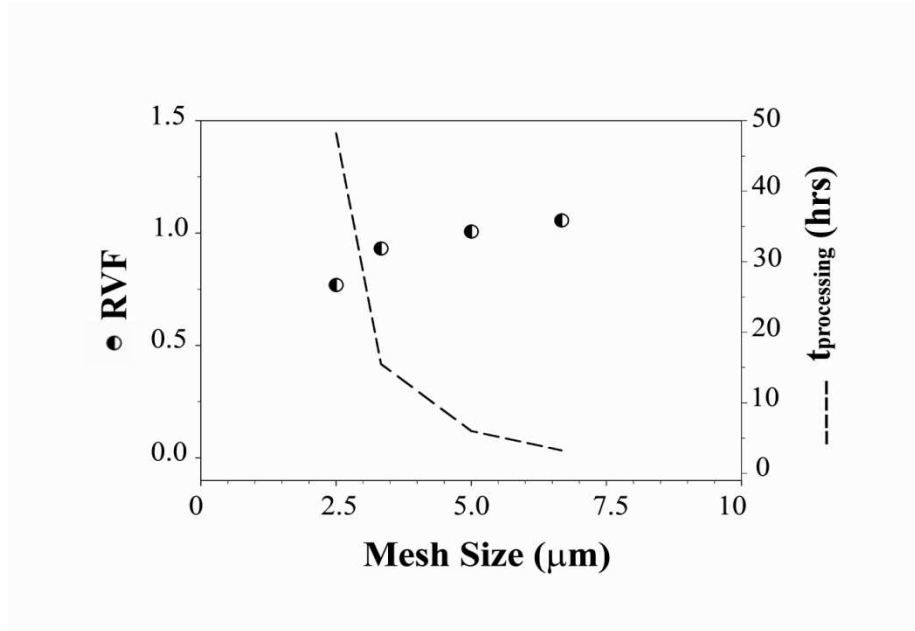

**Supplementary Figure 3.** The effect of changes in mesh size on the final RVF of the digitized sample ( $V_{\text{drop}}/V_{\text{chamber}}$ ) and simulation run time. The dashed line shows the change in the required simulation run time versus the mesh size. A 3-fold decrease in mesh size (i.e.,  $\delta = 6.67 \mu\text{m}$  to  $\delta = 2.5 \mu\text{m}$ , or 4,712 nodes to 74,225 nodes) resulted in a reduction in the digitized sample volume by 27.2%, and an increase in simulation run time from 3.25 hours to between 48 and 80 hours.

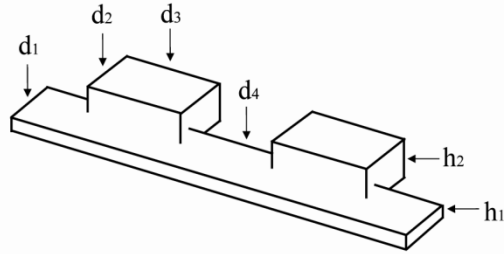

| d2   | d3  | h2  | Area of<br>Cavity<br>Opening | Surface<br>Area of<br>Cavity | Area of<br>Opening/Area<br>of Channel | Surface Area of<br>Cavity/Area of<br>Channel | Fraction of<br>Cavities<br>Filled | Number<br>of Trials |
|------|-----|-----|------------------------------|------------------------------|---------------------------------------|----------------------------------------------|-----------------------------------|---------------------|
| 30   | 300 | 110 | 12000                        | 90600                        | 3                                     | 22.65                                        | 0                                 | 13                  |
| 300  | 300 | 110 | 12000                        | 312000                       | 3                                     | 78                                           | 1                                 | 30                  |
| 125  | 200 | 110 | 8000                         | 121500                       | 2                                     | 30.375                                       | 1                                 | 38                  |
| 20   | 20  | 110 | 800                          | 9600                         | 0.2                                   | 2.4                                          | 0                                 | 96                  |
| 200  | 200 | 114 | 8000                         | 171200                       | 2                                     | 42.8                                         | 1                                 | 19                  |
| 300  | 200 | 114 | 8000                         | 234000                       | 2                                     | 58.5                                         | 1                                 | 19                  |
| 400  | 200 | 114 | 8000                         | 296800                       | 2                                     | 74.2                                         | 1                                 | 19                  |
| 500  | 200 | 114 | 8000                         | 359600                       | 2                                     | 89.9                                         | 1                                 | 19                  |
| 125  | 300 | 113 | 12000                        | 171050                       | 3                                     | 42.7625                                      | 1                                 | 15                  |
| 125  | 400 | 113 | 16000                        | 218650                       | 4                                     | 54.6625                                      | 1                                 | 11                  |
| 125  | 500 | 113 | 20000                        | 266250                       | 5                                     | 66.5625                                      | 1                                 | 10                  |
| 300  | 300 | 113 | 12000                        | 315600                       | 3                                     | 78.9                                         | 1                                 | 15                  |
| 30   | 25  | 75  | 1000                         | 9750                         | 0.25                                  | 2.4375                                       | 0                                 | 46                  |
| 50   | 25  | 75  | 1000                         | 13750                        | 0.25                                  | 3.4375                                       | 0                                 | 45                  |
| 30   | 50  | 75  | 2000                         | 15000                        | 0.5                                   | 3.75                                         | 0                                 | 76                  |
| 125  | 100 | 75  | 4000                         | 58750                        | 1                                     | 14.6875                                      | 0.6                               | 28                  |
| 125  | 50  | 75  | 2000                         | 38750                        | 0.5                                   | 9.6875                                       | 0.026                             | 39                  |
| 62.5 | 100 | 75  | 4000                         | 36875                        | 1                                     | 9.21875                                      | 0.214                             | 28                  |
| 62.5 | 50  | 75  | 2000                         | 23125                        | 0.5                                   | 5.78125                                      | 0                                 | 39                  |
| 125  | 200 | 80  | 8000                         | 102000                       | 2                                     | 25.5                                         | 1                                 | 97                  |
| 30   | 300 | 80  | 12000                        | 70800                        | 3                                     | 17.7                                         | 0                                 | 13                  |
| 300  | 300 | 80  | 12000                        | 276000                       | 3                                     | 69                                           | 1                                 | 30                  |
| 125  | 200 | 80  | 8000                         | 102000                       | 2                                     | 25.5                                         | 1                                 | 38                  |
| 20   | 20  | 80  | 800                          | 7200                         | 0.2                                   | 1.8                                          | 0                                 | 96                  |
| 200  | 200 | 80  | 8000                         | 144000                       | 2                                     | 36                                           | 1                                 | 19                  |
| 300  | 200 | 80  | 8000                         | 200000                       | 2                                     | 50                                           | 1                                 | 19                  |
| 400  | 200 | 80  | 8000                         | 256000                       | 2                                     | 64                                           | 1                                 | 19                  |
| 500  | 200 | 80  | 8000                         | 312000                       | 2                                     | 78                                           | 1                                 | 19                  |
| 125  | 300 | 74  | 12000                        | 137900                       | 3                                     | 34.475                                       | 1                                 | 15                  |
| 125  | 400 | 74  | 16000                        | 177700                       | 4                                     | 44.425                                       | 1                                 | 11                  |
| 125  | 500 | 74  | 20000                        | 217500                       | 5                                     | 54.375                                       | 1                                 | 10                  |
| 300  | 300 | 74  | 12000                        | 268800                       | 3                                     | 67.2                                         | 1                                 | 15                  |
| 30   | 25  | 113 | 1000                         | 13930                        | 0.25                                  | 3.4825                                       | 0                                 | 46                  |
| 50   | 25  | 113 | 1000                         | 19450                        | 0.25                                  | 4.8625                                       | 0                                 | 45                  |
| 30   | 50  | 113 | 2000                         | 21080                        | 0.5                                   | 5.27                                         | 0                                 | 76                  |
| 125  | 100 | 116 | 4000                         | 77200                        | 1                                     | 19.3                                         | 0.804                             | 28                  |
| 125  | 50  | 116 | 2000                         | 53100                        | 0.5                                   | 13.275                                       | 0                                 | 39                  |
| 62.5 | 100 | 116 | 4000                         | 50200                        | 1                                     | 12.55                                        | 0.679                             | 28                  |
| 62.5 | 50  | 116 | 2000                         | 32350                        | 0.5                                   | 8.0875                                       | 0                                 | 39                  |
| 125  | 200 | 122 | 8000                         | 129300                       | 2                                     | 32.325                                       | 1                                 | 97                  |

**Supplementary Figure 4.** List of all geometric variants of the side chambers in which sample digitization was evaluated.  $h_1$  and  $d_1$  were held constant at  $40\mu\text{m}$  and  $100\mu\text{m}$ , respectively. The fraction of filled cavities is listed for each iteration.
